# Supplementary material
Source: publisher site journal article supplement (https://www.spandidos-publications.com/8602/downloadSupplementary)
Supplement: Supplementary file 1 [file downloadSupplementary]

Table SI. Primer sequence.

| Gene name | Sequence, 5'-3'                                |
|-----------|------------------------------------------------|
| LSL-Kras  | Wild-type forward: TGT CTT TCC CCA GCA CAG T   |
|           | Common reverse: CTG CAT AGT ACG CTA TAC CCT GT |
|           | Mutant forward: GCA GGT CGA GGG ACC TAA TA     |
| Pdx1-Cre  | Forward: CCT GGA CTA CAT CTT GAG TTG C         |
|           | Reverse: AGG CAA ATT TTG GTG TAC GG            |
| Trp53     | Forward: GAG CAT GGA AGT AAG ACC CCT TCT       |
|           | Reverse: GAC AGG GTT TCT CTA TGT AGC CCT       |

The 'common reverse primer' is the universal reverse primer for both the wild-type and the LSL-Kras mutant alleles in the genotyping PCR.
